# Supplementary material for: Bibliometric Analysis and Visualization Mapping of Anthrax Vaccine Publications from 1991 through 2021
Source: MDPI journal article supplement (doi:10.3390/vaccines10071007), 2022-06-23
Supplement: s1 [file s1]

## Supplementary Materials

**Supplementary Table S1.** All countries or regions involved in anthrax vaccine research between 1991 and 2021.

|    | Country        | Articles | Percentage | Total Global Citations |
|----|----------------|----------|------------|------------------------|
| 1  | USA            | 663      | 60.8       | 22200                  |
| 2  | UK             | 97       | 8.9        | 3052                   |
| 3  | India          | 64       | 5.9        | 1070                   |
| 4  | China          | 55       | 5.0        | 737                    |
| 5  | Germany        | 41       | 3.8        | 1044                   |
| 6  | Israel         | 41       | 3.8        | 1807                   |
| 7  | France         | 36       | 3.3        | 1366                   |
| 8  | Unknown        | 34       | 3.1        | 531                    |
| 9  | Canada         | 27       | 2.5        | 687                    |
| 10 | Italy          | 24       | 2.2        | 498                    |
| 11 | South Korea    | 23       | 2.1        | 265                    |
| 12 | Iran           | 17       | 1.6        | 74                     |
| 13 | Russia         | 17       | 1.6        | 254                    |
| 14 | Australia      | 14       | 1.3        | 168                    |
| 15 | Japan          | 14       | 1.3        | 325                    |
| 16 | South Africa   | 12       | 1.1        | 217                    |
| 17 | Turkey         | 11       | 1.0        | 129                    |
| 18 | Switzerland    | 10       | 0.9        | 432                    |
| 19 | Brazil         | 7        | 0.6        | 265                    |
| 20 | Taiwan         | 6        | 0.6        | 196                    |
| 21 | Egypt          | 5        | 0.5        | 31                     |
| 22 | Sweden         | 5        | 0.5        | 121                    |
| 23 | Argentina      | 4        | 0.4        | 50                     |
| 24 | Belgium        | 4        | 0.4        | 280                    |
| 25 | Mexico         | 4        | 0.4        | 18                     |
| 26 | Netherlands    | 4        | 0.4        | 145                    |
| 27 | Nigeria        | 4        | 0.4        | 21                     |
| 28 | Poland         | 4        | 0.4        | 35                     |
| 29 | Zambia         | 4        | 0.4        | 21                     |
| 30 | Bangladesh     | 3        | 0.3        | 30                     |
| 31 | Colombia       | 3        | 0.3        | 80                     |
| 32 | Denmark        | 3        | 0.3        | 58                     |
| 33 | Ethiopia       | 3        | 0.3        | 17                     |
| 34 | Spain          | 3        | 0.3        | 90                     |
| 35 | Uganda         | 3        | 0.3        | 34                     |
| 36 | Armenia        | 2        | 0.2        | 11                     |
| 37 | Austria        | 2        | 0.2        | 11                     |
| 38 | Chad           | 2        | 0.2        | 31                     |
| 39 | Cote Ivoire    | 2        | 0.2        | 10                     |
| 40 | Czech Republic | 2        | 0.2        | 57                     |
| 41 | Georgia        | 2        | 0.2        | 23                     |
| 42 | Indonesia      | 2        | 0.2        | 14                     |
| 43 | Mongolia       | 2        | 0.2        | 8                      |
| 44 | New Zealand    | 2        | 0.2        | 28                     |
| 45 | Norway         | 2        | 0.2        | 656                    |
| 46 | Portugal       | 2        | 0.2        | 74                     |

|    |                      |   |     |    |
|----|----------------------|---|-----|----|
| 47 | Sudan                | 2 | 0.2 | 1  |
| 48 | Chile                | 1 | 0.1 | 52 |
| 49 | Croatia              | 1 | 0.1 | 4  |
| 50 | Finland              | 1 | 0.1 | 13 |
| 51 | Ghana                | 1 | 0.1 | 23 |
| 52 | Greece               | 1 | 0.1 | 35 |
| 53 | Ireland              | 1 | 0.1 | 25 |
| 54 | Jordan               | 1 | 0.1 | 10 |
| 55 | Kazakhstan           | 1 | 0.1 | 55 |
| 56 | Malaysia             | 1 | 0.1 | 48 |
| 57 | Mozambique           | 1 | 0.1 | 2  |
| 58 | Saudi Arabia         | 1 | 0.1 | 17 |
| 59 | Senegal              | 1 | 0.1 | 19 |
| 60 | Tanzania             | 1 | 0.1 | 4  |
| 61 | Thailand             | 1 | 0.1 | 2  |
| 62 | United Arab Emirates | 1 | 0.1 | 1  |
| 63 | Vietnam              | 1 | 0.1 | 70 |
| 64 | Zimbabwe             | 1 | 0.1 | 2  |
